# Supplementary material for: Beyond Antioxidant Activity: Redox Properties of Catechins May Affect Changes in the DNA Methylation Profile—The Example of SRXN1 Gene
Source: MDPI journal article supplement (doi:10.3390/antiox12030754), 2023-03-20
Supplement: s1 [file s1]

## SUPPLEMENTARY MATERIALS

**Table S1.** Primer sequences for SRXN1 gene used in MSP and MS-HRM.

| Primers | Product size | Forward 5'→3'          | Reverse 5'→3'            |
|---------|--------------|------------------------|--------------------------|
| M1      | 103 bp       | GTTAGATTGGAAGTGAATCGTT | CCAAAATAAATCGACAAAACCC   |
| U1      | 105 bp       | GTTAGATTGGAAGTGAATTGT  | AACCAAAATAAATCAACAAAACCC |
| M3      | 156 bp       | TTTTCGCGGTTTAAGTCGGT   | AAACTCTCCACCGAAAAACG     |
| U3      | 151 bp       | GTTTTTGTGGTTTAAGTTGGTT | TCCACCAAAAAACACCTCTC     |

**Table S2.** Primer sequences for SRXN1 and GAPDH genes used in RT-qPCR.

| Gene         | Product size | Forward 5'→3'          | Reverse 5'→3'          |
|--------------|--------------|------------------------|------------------------|
| <i>SRXN1</i> | 104 bp       | AACTAGCTGGACCCGTCACC   | TCGGGCCAAGGGCATCTAAG   |
| <i>GAPDH</i> | 131 bp       | GTCTCCTCTGACTTCAACAGCG | ACCACCCTGTTGCTGTAGCCAA |

**Table S3.** Methylation changes in CpG island within promoter region of *SRXN1* in HT29 cell line investigated with MSP. Cells were treated with catechins and glutathione at concentrations of 0.1, 1, 10 and 100  $\mu$ M for 24 h at 37°C. The results are means  $\pm$  SD of three biological replicates.

| Compound | Concentration<br>[ $\mu$ M] | MSP M1/U1            |                |          |
|----------|-----------------------------|----------------------|----------------|----------|
|          |                             | % DNA<br>methylation | Fold<br>change | p-value* |
| C        | 0.1                         | 13.53                | 0.986          | 0.9999   |
|          | 1                           | 13.80                | 1.005          | >0.9999  |
|          | 10                          | 14.87                | 1.084          | 0.9993   |
|          | 100                         | 14.51                | 1.057          | 0.9995   |
| EC       | 0.1                         | 11.25                | 0.820          | 0.9577   |
|          | 1                           | 9.43 <sup>a</sup>    | 0.687          | 0.5784   |
|          | 10                          | 12.35                | 0.900          | 0.9991   |
|          | 100                         | 13.11                | 0.955          | 0.9996   |
| EGC      | 0.1                         | 14.63                | 1.066          | 0.9994   |
|          | 1                           | 15.64                | 1.139          | 0.9909   |
|          | 10                          | 14.74                | 1.074          | 0.9994   |
|          | 100                         | 17.29                | 1.259          | 0.6757   |
| ECG      | 0.1                         | 16.56                | 1.207          | 0.8919   |
|          | 1                           | 15.22                | 1.109          | 0.9990   |
|          | 10                          | 16.52                | 1.204          | 0.9018   |
|          | 100                         | 17.03                | 1.241          | 0.7617   |
| EGCG     | 0.1                         | 15.97                | 1.163          | 0.9818   |
|          | 1                           | 9.21                 | 0.671          | 0.3687   |
|          | 10                          | 12.56                | 0.915          | 0.9993   |
|          | 100                         | 15.62                | 1.138          | 0.9912   |
| GSH      | 0.1                         | 16.26                | 1.140          | 0.8034   |
|          | 1                           | 11.44                | 0.802          | 0.5787   |
|          | 10                          | 16.54                | 1.159          | 0.7297   |
|          | 100                         | 17.23                | 1.207          | 0.5431   |

\* statistical analysis was performed using one-way ANOVA with Dunnett's test with a cut at  $p < 0.05$

<sup>a</sup> the result is a mean  $\pm$  SD of two biological replicates

**Table S4.** Methylation changes in CpG island within promoter region of *SRXN1* in HT29 cell line investigated with MS-HRM. Cells were treated with catechins and glutathione at concentrations of 0.1, 1, 10 and 100  $\mu$ M for 24 h at 37°C. The results are means  $\pm$  SD of three biological replicates.

| Compound | Concentration<br>[ $\mu$ M] | MS-HRM               |                |                  |                      |                |                  |
|----------|-----------------------------|----------------------|----------------|------------------|----------------------|----------------|------------------|
|          |                             | M1/U1                |                |                  | M3/U3                |                |                  |
|          |                             | % DNA<br>methylation | Fold<br>change | <i>p</i> -value* | % DNA<br>methylation | Fold<br>change | <i>p</i> -value* |
| C        | 0.1                         | 4.92                 | 0.428          | 0.0074           | 18.28                | 0.851          | 0.8725           |
|          | 1                           | 5.72                 | 0.498          | 0.0255           | 17.43                | 0.811          | 0.6282           |
|          | 10                          | 3.78                 | 0.330          | 0.0012           | 17.11                | 0.797          | 0.5298           |
|          | 100                         | 5.68                 | 0.495          | 0.0241           | 17.94                | 0.836          | 0.7866           |
| EC       | 0.1                         | 3.06                 | 0.267          | 0.0003           | 15.33                | 0.714          | 0.1453           |
|          | 1                           | 4.81                 | 0.419          | 0.0062           | 17.37                | 0.809          | 0.6125           |
|          | 10                          | 2.71                 | 0.236          | 0.0002           | 14.71                | 0.685          | 0.0827           |
|          | 100                         | 1.52                 | 0.133          | 0.0002           | 12.94                | 0.602          | 0.0346           |
| EGC      | 0.1                         | 10.83                | 0.943          | 0.9995           | 23.91                | 1.113          | 0.9841           |
|          | 1                           | 6.28                 | 0.547          | 0.0560           | 19.71                | 0.918          | 0.9959           |
|          | 10                          | 20.30                | 1.768          | 0.0002           | 28.58                | 1.331          | 0.0593           |
|          | 100                         | 7.84                 | 0.682          | 0.3482           | 22.65                | 1.055          | 0.9993           |
| ECG      | 0.1                         | 9.90                 | 0.862          | 0.9896           | 12.80                | 0.596          | 0.0111           |
|          | 1                           | 5.49                 | 0.478          | 0.0181           | 17.53                | 0.816          | 0.6616           |
|          | 10                          | 21.69                | 1.889          | <0.0001          | 30.28                | 1.410          | 0.0095           |
|          | 100                         | 18.33                | 1.596          | 0.0047           | 26.42                | 1.230          | 0.3679           |
| EGCG     | 0.1                         | 7.39                 | 0.643          | 0.3428           | 19.06                | 0.888          | 0.9849           |
|          | 1                           | 6.53                 | 0.569          | 0.0787           | 18.95                | 0.882          | 0.9766           |
|          | 10                          | 3.09                 | 0.269          | 0.0016           | 19.77                | 0.920          | 0.9989           |
|          | 100                         | 11.52                | 1.003          | >0.9999          | 14.50                | 0.675          | 0.0677           |
| GSH      | 0.1                         | 6.16                 | 1.067          | 0.9976           | 15.43                | 0.942          | 0.9292           |
|          | 1                           | 6.92                 | 1.199          | 0.8934           | 19.06                | 1.163          | 0.3171           |
|          | 10                          | 5.83                 | 1.009          | >0.9999          | 19.51                | 1.191          | 0.2087           |
|          | 100                         | 3.88                 | 0.672          | 0.6301           | 16.44                | 1.003          | >0.9999          |

\* statistical analysis was performed using one-way ANOVA with Dunnett's test with a cut at  $p < 0.05$

**Table S5.** Changes in SRXN1 gene expression analysed with RT-qPCR method. Expression levels were calculated using relative delta delta Ct method. Data was normalized to GAPDH gene expression. The results are means  $\pm$  SD of three biological replicates.

| Sample  | Average relative mRNA levels | SD     | <i>p</i> -value* | Fold change | Fold regulation | Fold regulation from profiler [9] |
|---------|------------------------------|--------|------------------|-------------|-----------------|-----------------------------------|
| Control | 0.0218                       | 0.0090 | -                | 0           | 0               | 0                                 |
| EGC 10  | 0.0052                       | 0.0060 | 0.0294           | 0.238       | -4.209          | -2.542                            |
| ECG 10  | 0.0186                       | 0.0063 | 0.8662           | 0.855       | -1.170          | -1.592                            |
| ECG 100 | 0.0102                       | 0.0008 | 0.1243           | 0.467       | -2.141          | -                                 |

\* statistical analysis was performed using one-way ANOVA with Dunnett's test with a cut at  $p < 0.05$

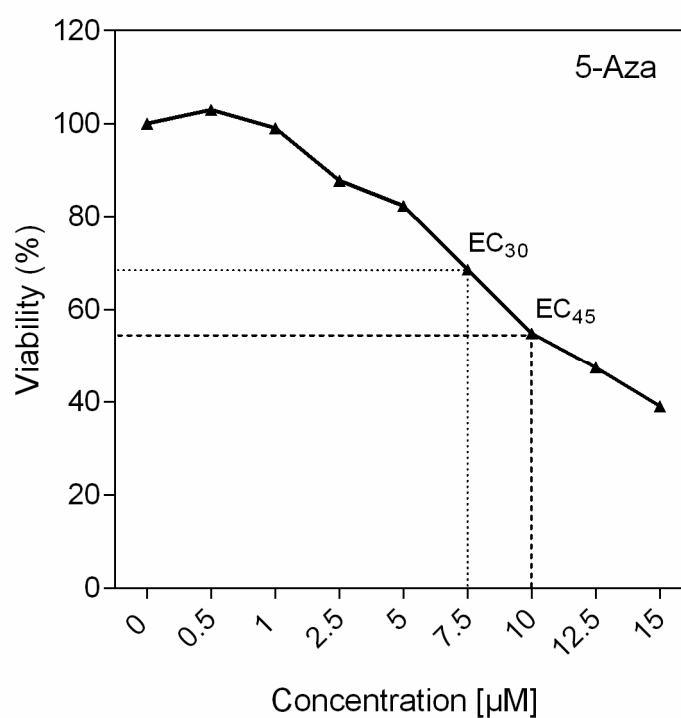

**Figure S1.** Inhibition of growth of HT29 cells determined by MTT assay after 72 h treatment with 5-Aza. Viability is expressed as a percentage relative to control cells (100%). EC<sub>30</sub> and EC<sub>45</sub> are the effective concentrations of 30% and 45% of cell growth inhibition. Results are means of three independent experiments carried out in triplicate (SD < 15%).

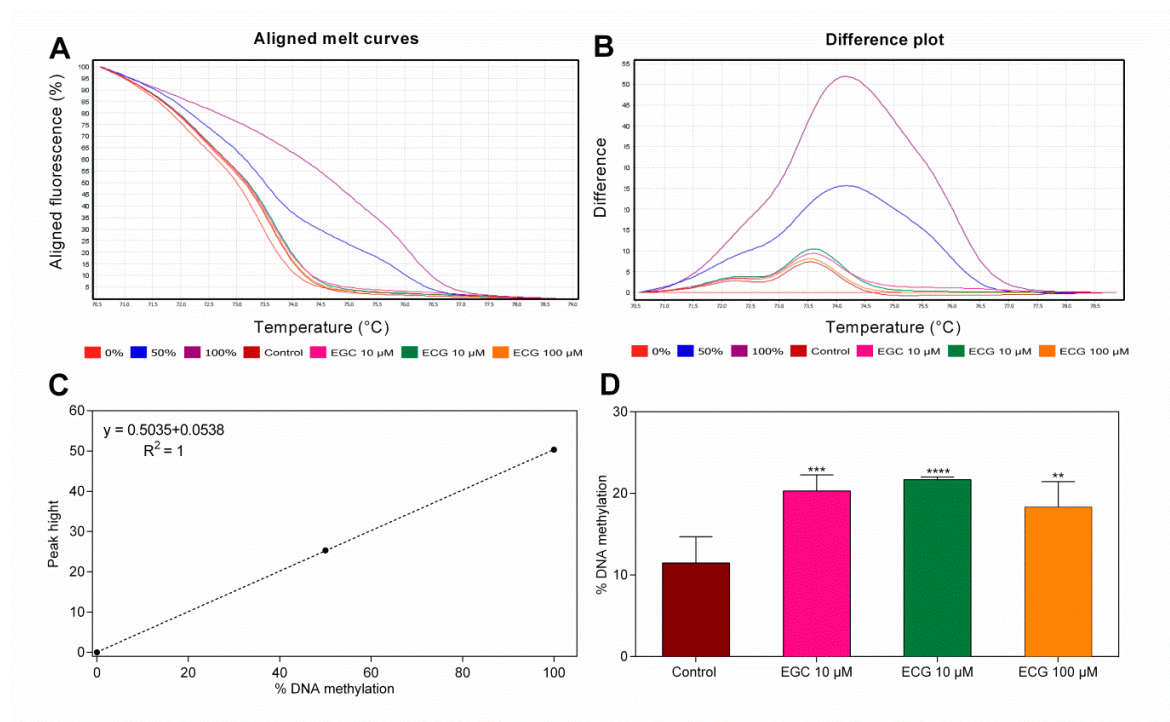

**Figure S2.** The increase in DNA methylation level of SRXN1 gene determined by MS-HRM using M1/U1 primer sets following 24 h treatment of HT29 cells with catechins that increase methylation profile of SRXN1 promoter. (A) The printouts document the representative aligned melt curves and (B) difference plots showing positions of control, EGC 10 μM, EGC 10 μM and EGC 100 μM with respect to 0, 50 and 100% methylated standards. (C) Standard curve and linear regression equation were obtained by plotting the peak heights of standards (extracted from difference curves aligned against unmethylated control (0%)) and percentage of DNA methylation. (D) Bar graph presenting the increase in DNA methylation levels based on standard curves for EGC 10 μM, EGC 10 μM and EGC 100 μM. The asterisks mark *p*-values as follows: (\*\*)—≤ 0.01, (\*\*\*)—≤ 0.001, and (\*\*\*\*)—≤ 0.0001.

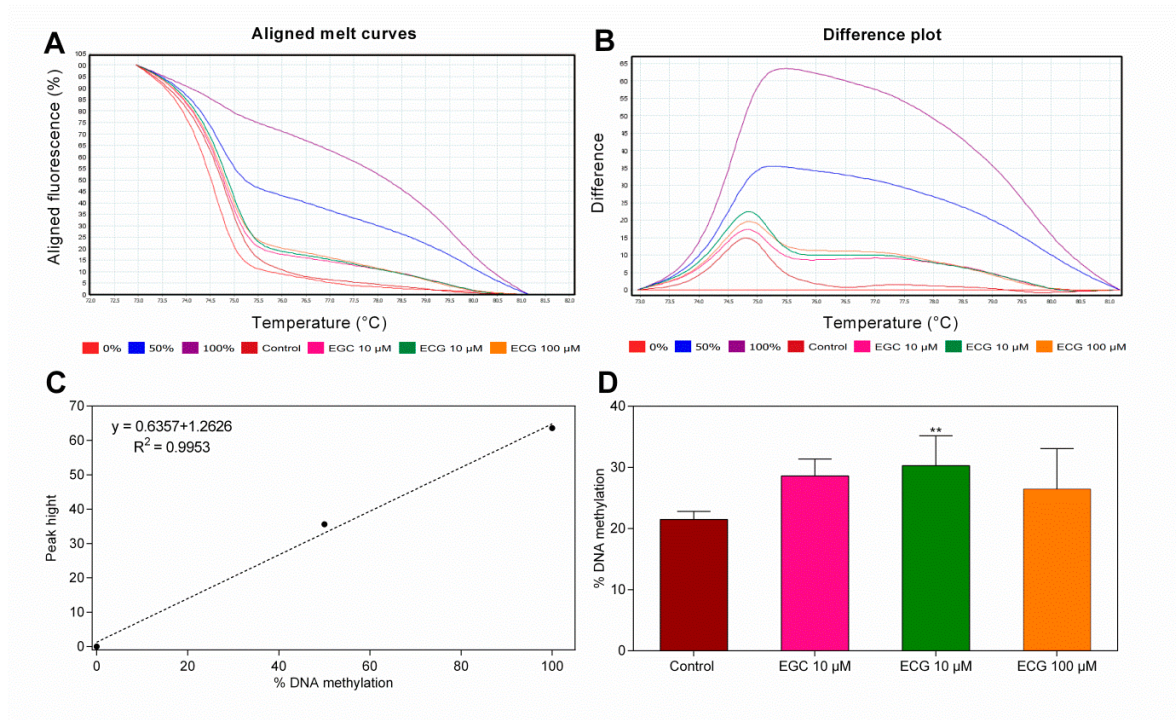

**Figure S3.** The increase in DNA methylation level of SRXN1 gene determined by MS-HRM using M3/U3 primer sets following 24 h treatment of HT29 cells with catechins that increase methylation profile of SRXN1 promoter. (A) The printouts document the representative aligned melt curves and (B) difference plots showing positions of control, EGC 10 µM, EGC 10 µM and EGC 100 µM with respect to 0, 50 and 100% methylated standards. (C) Standard curve and linear regression equation were obtained by plotting the peak heights of standards (extracted from difference curves aligned against unmethylated control (0%)) and percentage of DNA methylation. (D) Bar graph presenting the increase in DNA methylation levels based on standard curves for EGC 10 µM, EGC 10 µM and EGC 100 µM. The asterisks mark  $p$ -values as follows: (\*\*) $\leq 0.01$ .
